# Supplementary material for: Consecutive Photoinduced Electron Transfer (conPET): The Mechanism of the Photocatalyst Rhodamine 6G
Source: PubMed Central journal article supplement — Chemistry. 2020 May 26;26(35):7946–54. doi: 10.1002/chem.201905167 (PMC7383674; doi:10.1002/chem.201905167), 2020-05-26
Supplement: CHEM-26-7946-s001.pdf [file CHEM-26-7946-s001.pdf]

# Chemistry–A European Journal

Supporting Information

## **Consecutive Photoinduced Electron Transfer (conPET): The Mechanism of the Photocatalyst Rhodamine 6G**

Fabian Brandl, Sebastian Bergwinkl, Carina Allacher, and Bernhard Dick<sup>\*[a]</sup>

## **Author Contributions**

C.A. Methodology: supporting

B.D. Conceptualization: lead; formal analysis: equal; funding acquisition: lead; software: lead; writing—original draft: lead; writing—review and editing: Equal.

# Supplementary Information

## Contents

**Table X1:** Energies for groundstates for DIPEA species

**Figure S1:** Absorption spectrum of rhodamine-6G radical

**Figure S2:** Transient absorption spectrum of rhodamine-6g radical generated by LED in DMSO with DIPEA and time profiles

**Figure S3:** DADS of exc. radical generated by LED in DMSO with DIPEA and substrate

**Figure S4:** DADS of exc. radical generated by LED in MeCN with DIPEA

**Figure S5:** DADS of exc. radical generated by LED in DCM with DIPEA

**Figure S6:** DADS of exc. radical generated by Zn in DMSO

**Figure S7:** Decomposed species spectra in DMSO

**Figure S8:** Concentration profiles during green LED irradiation in DMSO

**Figure S9:** Concentration profiles during blue LED irradiation in DMSO

*Table X1: Absolute energies (Hartree) for the optimized ground state structures of the various DIPEA species (D1 – D7), the rhodamine-6G cation (R6G<sup>+</sup>), and the rhodamine-6G radical (R6G<sup>•</sup>), obtained with B3LYP/cc-pVTZ and B3LYP/aug-cc-pVTZ both in vacuum and with DMSO as solvent (D-PCM model). The energy differences of products and reactants for the various electron and proton transfer reactions (see schemes 2 and 3) are given in kcal/mole units.*

|                     | DFT-CCT      | DFT-CCT-DMSO | DFT-ACCT     | DFT-ACCT-DMSO |
|---------------------|--------------|--------------|--------------|---------------|
| D1                  | -371.174644  | -371.176632  | -371.177640  | -371.179548   |
| D2                  | -370.920076  | -370.992858  | -370.922477  | -370.995096   |
| D3a                 | -370.358991  | -370.431713  | -370.361424  | -370.434097   |
| D3b                 | -370.353349  | -370.426873  | -370.355768  | -370.429218   |
| D4a                 | -370.520662  | -370.522418  | -370.523809  | -370.525571   |
| D4b                 | -370.523621  | -370.526147  | -370.527238  | -370.529726   |
| D5                  | -371.568258  | -371.642784  | -371.570735  | -371.645142   |
| R6G <sup>+</sup>    | -1106.563577 | -1106.634445 | -1106.563577 | -1106.634445  |
| R6G <sup>•</sup>    | -1106.736914 | -1106.759222 | -1106.736914 | -1106.759222  |
| Reaction [kcal/mol] |              |              |              |               |
| Reaction-1a         | 3.64         | 2.69         | 3.50         | 2.47          |
| Reaction-1b         | 1.78         | 0.35         | 1.34         | -0.14         |
| Reaction-2a         | -7.32        | -21.38       | -6.87        | -20.90        |
| Reaction-2b         | -1.92        | -16.00       | -1.17        | -15.23        |
| Reaction-3          | -5.40        | -5.38        | -5.70        | -5.67         |

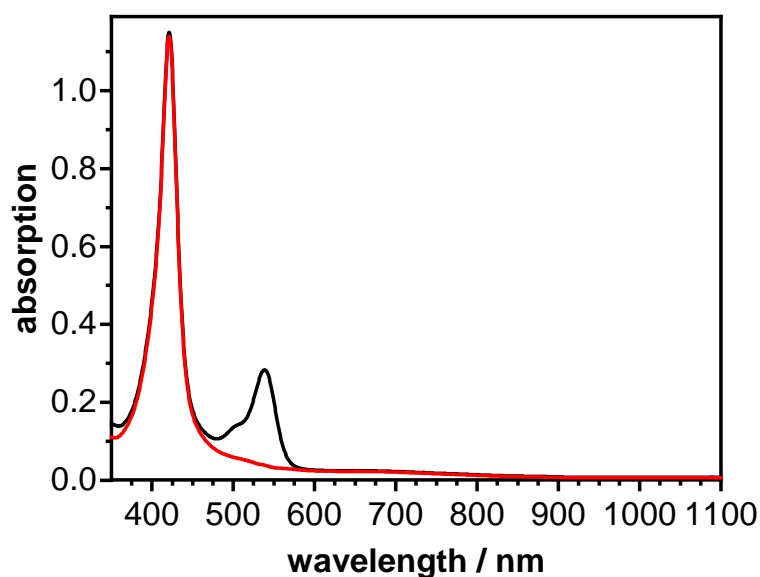

*Figure S1: Absorption spectrum of R6G radical generated with Zn and some not converted R6G<sup>+</sup> (black spectrum). The spectrum of pure R6G radical (red spectrum) was obtained by subtraction of the R6G<sup>+</sup> spectrum.*

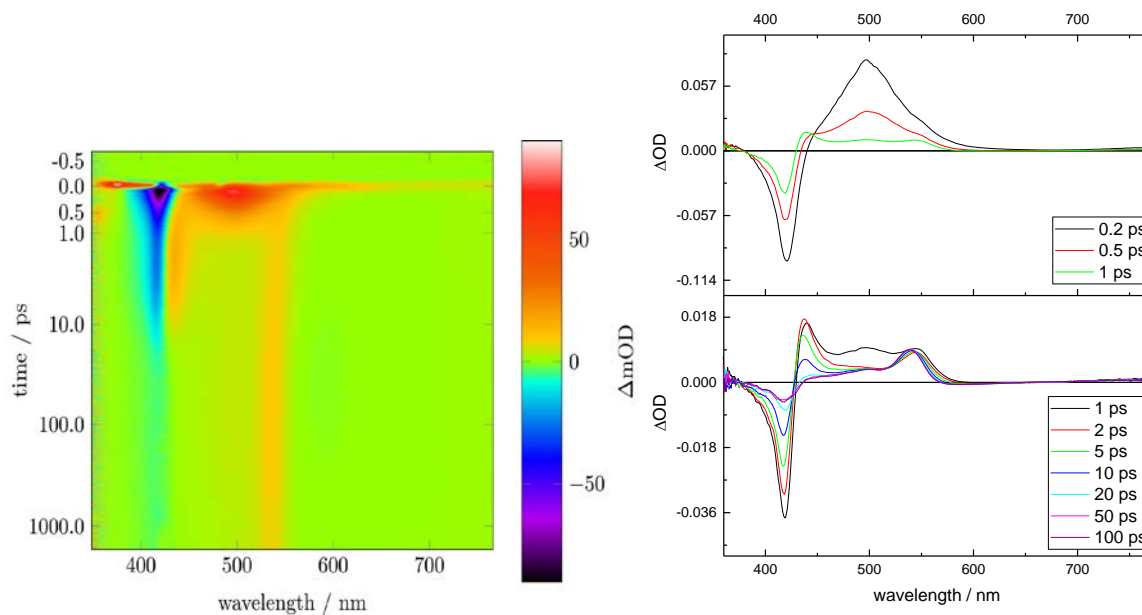

Figure S2: Transient absorption spectrum of R6G\* in DMSO, generated with DIPEA. Blue shades mark a loss of absorption, like the ground state bleach at 420nm. Red shades mark excited state absorption. On the right time profiles are shown. Fitting this spectrum leads to DADS seen in Figure 5.

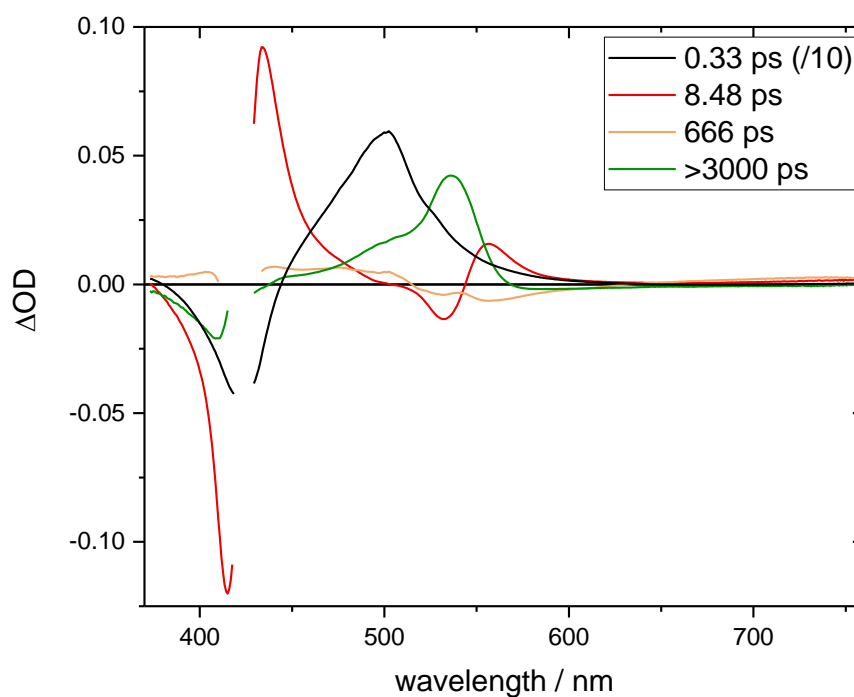

Figure S3: DADS of excited rhodamine radical generated with DIPEA in DMSO and with 2-Bromobenzonitrile ( $c = 8.6 \times 10^{-2} \text{ M}$ ). The substrate shows now influence, the results are similar to the measurements without substrate.

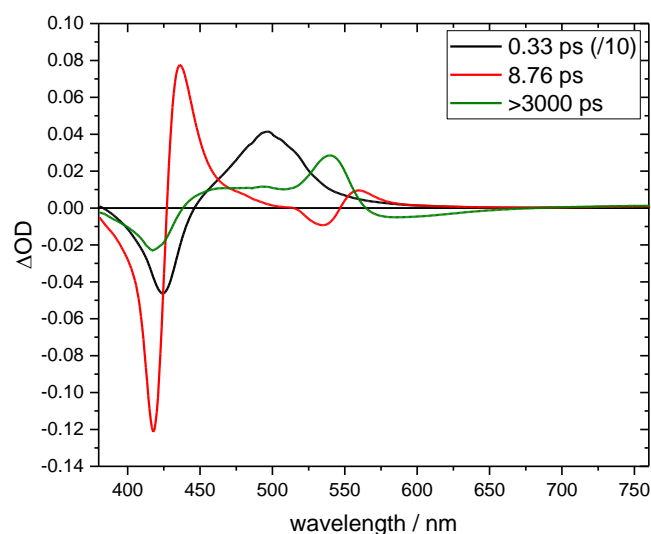

Figure S4: DADS of excited rhodamine radical generated with Zn in DMSO. A fast component (black) mainly describing the decay of the excited radical state to electronic groundstate of the radical. The intensity was divided by ten to plot it together with other components. The red component describes the spectral shift of both, radical and rhodamine 6g due to vibrational cooling. The long component consists of the stimulated emission, belonging to the not converted rhodamine 6g, and the remaining rhodamine after oxidation of the radical and cooling together with the radical groundstate bleach.

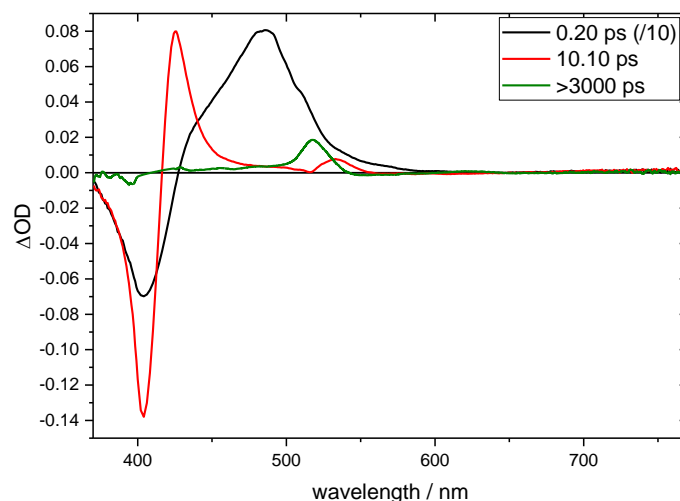

Figure S5: DADS of excited rhodamine radical generated with a green LED and DIPEA in MeCN. A fast component (black) mainly describing the decay of the excited radical state to electronic groundstate of the radical. The intensity was divided by ten to plot it together with other components. The red component describes the spectral shift of both, radical and rhodamine 6g due to vibrational cooling. The long component consists of the remaining rhodamine after oxidation of the radical and cooling together with the radical groundstate bleach.

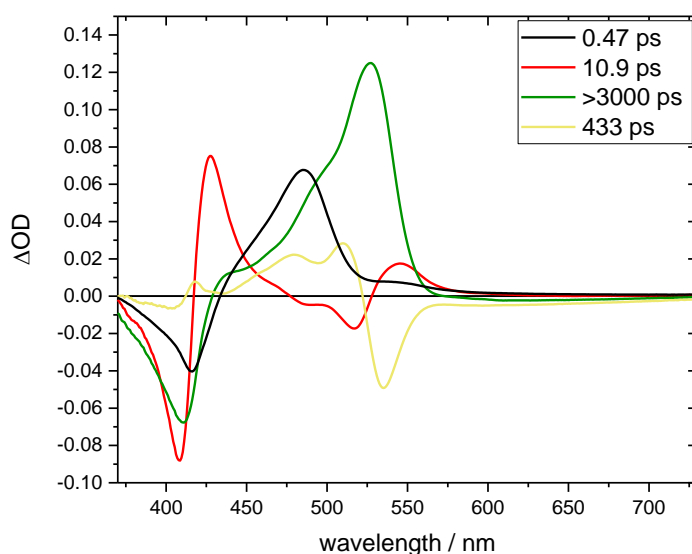

Figure S6: DADS of excited rhodamine radical generated with a green LED and DIPEA in DCM . The fast component (black) mainly describing the decay of the excited radical state to electronic groundstate of the radical. The intensity was divided by ten to plot it together with other components. The red component describes the spectral shift of both, radical and rhodamine 6g due to vibrational cooling. The Yellow component contains the stimulated emission. The long component consists of the remaining rhodamine after oxidation of the radical and cooling together with the radical groundstate bleach.

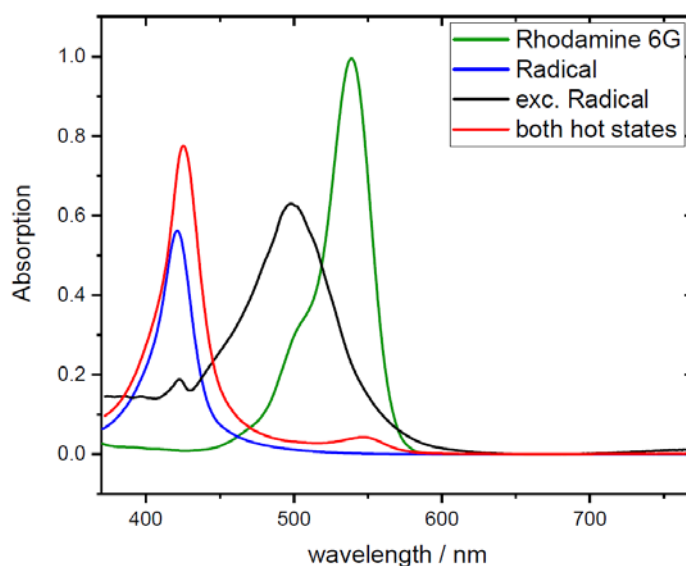

Figure S7: Absorption spectra of all rhodamine 6g species in DMSO. Green is the rhodamine 6g and blue the radical in their ground states respectively. Black is the decomposed excited radical and red is the combined vibrational hot state of rhodamine 6g and radical.

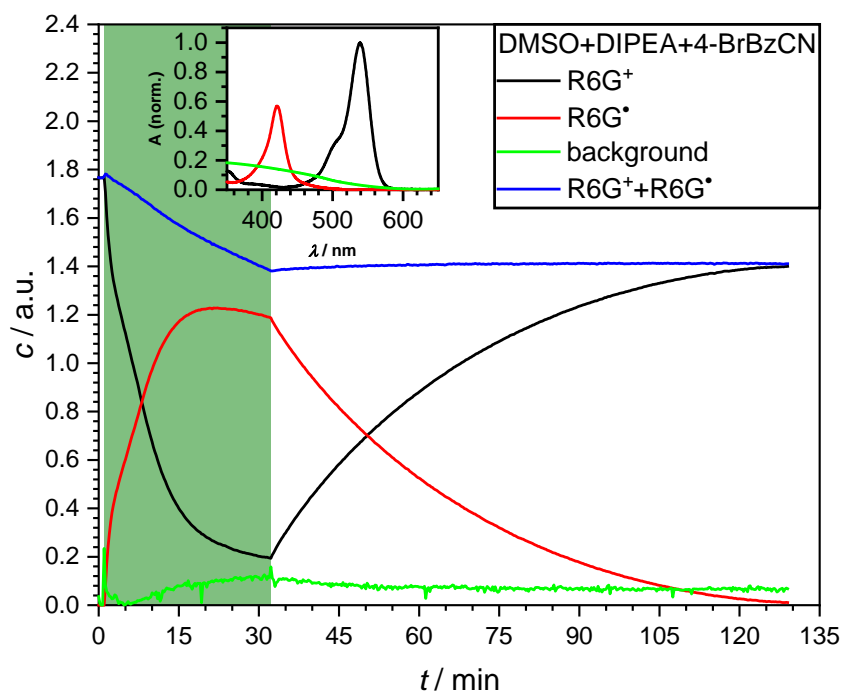

Figure S8: Concentration profiles of R6G<sup>+</sup> and R6G<sup>\*</sup> in a solution of R6G<sup>+</sup> in DMSO with DIPEA and 4-Bromobenzonitrile (4-BrBzCN) irradiated with green LEDs in the green highlighted time range. A third component denoted by background was used to describe instrumental drifts and other generated species. The corresponding spectra are displayed in the inset.

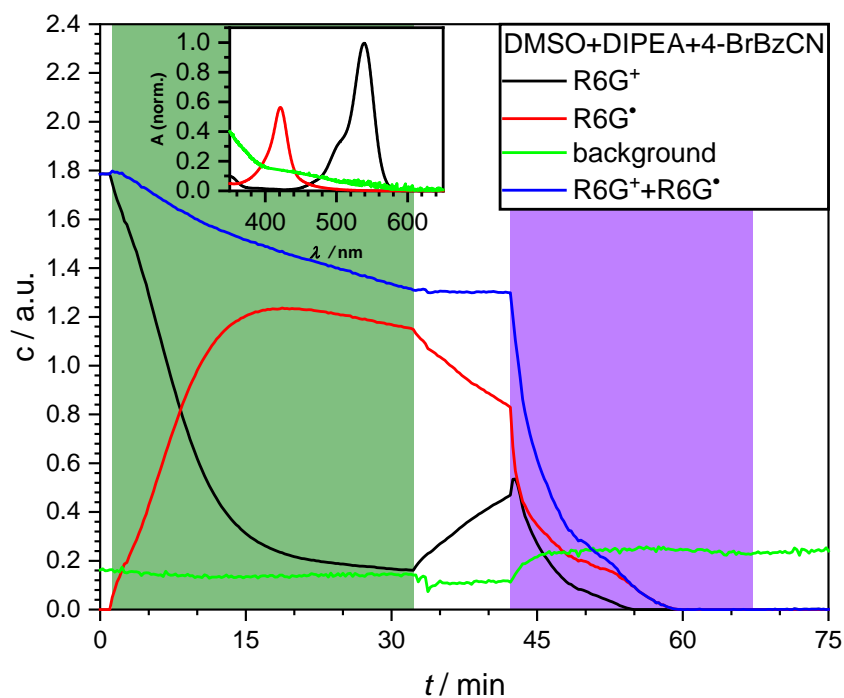

Figure S9: Concentration profiles of R6G<sup>+</sup> and R6G<sup>\*</sup> in a solution of R6G<sup>+</sup> in DMSO with DIPEA and 4-Bromobenzonitrile (4-BrBzCN) irradiated with green or blue (420 nm) LEDs in the highlighted time ranges. A third component denoted by background was used to describe instrumental drifts and other generated species. The corresponding spectra are displayed in the inset.
